# Supplementary material for: Ru(EDTA) mediated partial reduction of O2 by H2S
Source: Royal Society of Chemistry journal article supplement (doi:10.1039/c5dt00472a), 2015-01-01
Supplement: c5dt00472a1.pdf [file c5dt00472a1.pdf]

## Electronic Supplementary Information (ESI)

### Ru(EDTA) mediated partial reduction of O<sub>2</sub> by H<sub>2</sub>S<sup>†</sup>

Debabrata Chatterjee\* Namita Jaiswal and Papyia Sarkar

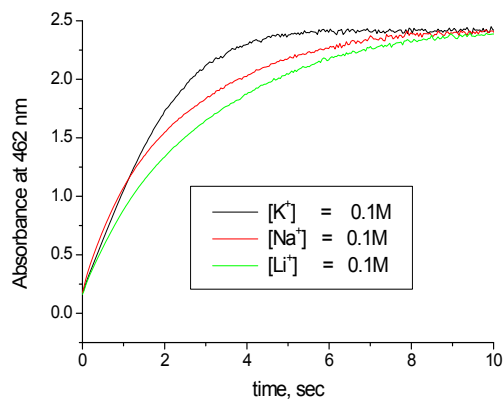

**Fig. S1** Effect of alkali cation on the formation of [Ru<sup>II</sup>(EDTA)(pz)]<sup>2-</sup> in the reduction of [Ru<sup>III</sup>(EDTA)(pz)]<sup>-</sup> (0.2mM) with HS<sup>-</sup> (2.0 mM) at 25 °C, pH = 8.5 (phosphate buffer).

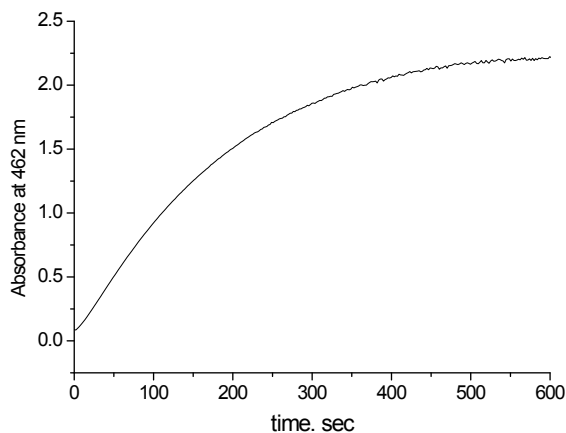

**Fig. S2** Kinetic traces for the reaction of [Ru<sup>III</sup>(EDTA)(pz)]<sup>-</sup> with H<sub>2</sub>S at 25 °C and pH 5.5 (acetate buffer [Ru<sup>III</sup>] = 0.2 mM, [HS<sup>-</sup>]<sub>T</sub> = 2.0 mM).
